# Supplementary material for: Survival Status and Risk Factors for Neonatal Mortality in a Byumba Level Two Teaching Hospital: A Prospective Cohort Study
Source: Research Square preprint supplement (doi:10.21203/rs.3.rs-7436214/v1), 2025-10-08
Supplement: Supplementary file 1 [file e08c9609318c4d70f36d5d1a.pdf]

## Data collection tool

### Instructions:

- ✓ Please ensure accuracy and completeness in recording information. If a particular variable does not apply, mark it as "N/A" or "Not Applicable."
- ✓ Put X in corresponding ☐
- ✓ Write the corresponding answer to dedicated areas (.....)

| S/N                     | Variable                  | Data                                                                                                                                                                                                                                                                   |
|-------------------------|---------------------------|------------------------------------------------------------------------------------------------------------------------------------------------------------------------------------------------------------------------------------------------------------------------|
| <b>SOCIODEMOGRAPHIC</b> |                           |                                                                                                                                                                                                                                                                        |
| 1                       | Education Level of Mother | <input type="checkbox"/> None (1)<br><input type="checkbox"/> Primary (2)<br><input type="checkbox"/> Secondary (3)<br><br><input type="checkbox"/> University (4)                                                                                                     |
| 2                       | Residency                 | <input type="checkbox"/> Rural (1)<br><input type="checkbox"/> Urban (2)                                                                                                                                                                                               |
| 3                       | Age of Mother (years)     | <input type="checkbox"/> Below 19 (1)<br><input type="checkbox"/> 19–24 (2)<br><input type="checkbox"/> 25-29 (3)<br><input type="checkbox"/> 29-34 (4)<br><br><input type="checkbox"/> 35 and above (5)                                                               |
| 4                       | Delivery place            | <input type="checkbox"/> Home (1)<br><input type="checkbox"/> Health Post (2)<br><input type="checkbox"/> Health Center (3)<br><input type="checkbox"/> Ambulance (4)<br><input type="checkbox"/> Hospital (5)<br><br><input type="checkbox"/> Other: Specify..... (6) |
| <b>MATERNAL FACTORS</b> |                           |                                                                                                                                                                                                                                                                        |
| 5                       | Parity                    | <input type="checkbox"/> Primiparous (1)<br><input type="checkbox"/> Multiparous (2)                                                                                                                                                                                   |
| 6                       | Multiple Birth            | <input type="checkbox"/> Yes (1)<br><input type="checkbox"/> No (2)                                                                                                                                                                                                    |
| 7                       | Gestation age             | <input type="checkbox"/> Above 42 weeks (1)<br><input type="checkbox"/> 37–42 weeks (2)<br><input type="checkbox"/> 34–36 weeks (3)<br><input type="checkbox"/> 28–33 weeks (4)                                                                                        |

|                                                                 |                                     |                                                                                                                                                                                                                                                                                      |
|-----------------------------------------------------------------|-------------------------------------|--------------------------------------------------------------------------------------------------------------------------------------------------------------------------------------------------------------------------------------------------------------------------------------|
|                                                                 |                                     | <input type="checkbox"/> Below 28 weeks (5)                                                                                                                                                                                                                                          |
| 8                                                               | Antenatal care services             | <input type="checkbox"/> 3 and Above (1)<br><input type="checkbox"/> 1-2 (2)<br><input type="checkbox"/> None (2)                                                                                                                                                                    |
| 9                                                               | PROM                                | <input type="checkbox"/> Yes (1)<br><input type="checkbox"/> No (2)                                                                                                                                                                                                                  |
| 10                                                              | If PROM, Duration of PROM           | <input type="checkbox"/> < 12 hours (1)<br><input type="checkbox"/> ≥ 12 hours (2)                                                                                                                                                                                                   |
| 11                                                              | If PROM, Antibiotic for prophylaxis | <input type="checkbox"/> Yes (1)<br><input type="checkbox"/> No (2)                                                                                                                                                                                                                  |
| 12                                                              | Onset of labor                      | <input type="checkbox"/> Spontaneous (1)<br><input type="checkbox"/> Induced (2)<br><input type="checkbox"/> C/Section before onset (3)<br><input type="checkbox"/> Unknown (4)                                                                                                      |
| 13                                                              | Mode of delivery                    | <input type="checkbox"/> Normal(svd) (1)<br><input type="checkbox"/> Assisted (2)<br><input type="checkbox"/> Ceserean (3)                                                                                                                                                           |
| 14                                                              | Steroids given during pregnancy     | <input type="checkbox"/> Yes (1)<br><input type="checkbox"/> No (2)<br><input type="checkbox"/> Not documented (3)<br><input type="checkbox"/> Not eligible (4)                                                                                                                      |
| 15                                                              | Any comorbidities                   | <input type="checkbox"/> None (1)<br><input type="checkbox"/> HIV (2)<br><input type="checkbox"/> Hypertension (3)<br><input type="checkbox"/> Anemia (4)<br><input type="checkbox"/> DM (5)<br><input type="checkbox"/> STI (6)<br><input type="checkbox"/> Other, specify..... (7) |
| <b>FETAL CONDITION AND CASUSE OF NEONATAL ADMISSION IN NICU</b> |                                     |                                                                                                                                                                                                                                                                                      |
| 16                                                              | Date of admission                   | ...../...../.....                                                                                                                                                                                                                                                                    |
| 17                                                              | Age of newborn at delivery          | <input type="checkbox"/> Post term (Above 42 weeks) (1)<br><input type="checkbox"/> Term (37-42 weeks) (2)<br><input type="checkbox"/> Preterm (32-36 weeks) (3)<br><input type="checkbox"/> Very preterm (Below 32 weeks) (4)                                                       |
| 18                                                              | Temperature at admission            | <input type="checkbox"/> 36.5-37.5 (1)<br><input type="checkbox"/> Above 37.5 (2)<br><input type="checkbox"/> Below 36.5 (3)                                                                                                                                                         |

|    |                                        |                                                                                                                                                                                                                                                                                                                                                                                                                                                                                                                                                                                      |
|----|----------------------------------------|--------------------------------------------------------------------------------------------------------------------------------------------------------------------------------------------------------------------------------------------------------------------------------------------------------------------------------------------------------------------------------------------------------------------------------------------------------------------------------------------------------------------------------------------------------------------------------------|
| 19 | Causes of Neonatal admission           | <input type="checkbox"/> Prematurity<br><input type="checkbox"/> VLBW<br><input type="checkbox"/> LBW<br><input type="checkbox"/> Early ONS<br><input type="checkbox"/> Late ONS<br><input type="checkbox"/> Birth Asphxia<br><input type="checkbox"/> Respiratory distress syndrome<br><input type="checkbox"/> Hypoglycemia<br><input type="checkbox"/> Neonatal Jaundice<br><input type="checkbox"/> Severe Birth Trauma<br><input type="checkbox"/> RVI Exposed<br><input type="checkbox"/> Congenital Malformation<br><input type="checkbox"/> Others*(Hep inf, anemia and NEC) |
| 20 | Age at Admission                       | <input type="checkbox"/> > 7 days<br><input type="checkbox"/> ≤7 days                                                                                                                                                                                                                                                                                                                                                                                                                                                                                                                |
| 21 | Gender                                 | <input type="checkbox"/> Male<br><input type="checkbox"/> Female                                                                                                                                                                                                                                                                                                                                                                                                                                                                                                                     |
| 22 | Weight                                 | <input type="checkbox"/> ≥ 4500 mg<br><input type="checkbox"/> 2500-4500 mg<br><input type="checkbox"/> < 2500 mg                                                                                                                                                                                                                                                                                                                                                                                                                                                                    |
| 23 | Resuscitation at birth                 | <input type="checkbox"/> None<br><input type="checkbox"/> Stabilisation/Stimulation<br><input type="checkbox"/> Stimulation and Suction<br><input type="checkbox"/> Stimulation, Suction, Bag and mask<br><input type="checkbox"/> Until external cardiac massage                                                                                                                                                                                                                                                                                                                    |
| 24 | Scored APGAR                           | <input type="checkbox"/> 1 <sup>st</sup> minute:<br><input type="checkbox"/> 5 <sup>th</sup> Minute:                                                                                                                                                                                                                                                                                                                                                                                                                                                                                 |
| 25 | Breastfeed within 1 hr                 | <input type="checkbox"/> Yes<br><input type="checkbox"/> No                                                                                                                                                                                                                                                                                                                                                                                                                                                                                                                          |
| 26 | Any hypothermia during hospitalisation | <input type="checkbox"/> Yes<br><input type="checkbox"/> No                                                                                                                                                                                                                                                                                                                                                                                                                                                                                                                          |
| 27 | PNA                                    | <input type="checkbox"/> Yes<br><input type="checkbox"/> No                                                                                                                                                                                                                                                                                                                                                                                                                                                                                                                          |
| 28 | Kangaroo Mother Care                   | <input type="checkbox"/> Yes<br><input type="checkbox"/> No                                                                                                                                                                                                                                                                                                                                                                                                                                                                                                                          |
| 29 | Respiratory support                    | <input type="checkbox"/> No                                                                                                                                                                                                                                                                                                                                                                                                                                                                                                                                                          |

|                                                |                                               |                                                                                                                                                                                                            |
|------------------------------------------------|-----------------------------------------------|------------------------------------------------------------------------------------------------------------------------------------------------------------------------------------------------------------|
|                                                |                                               | <input type="checkbox"/> CPAP<br><input type="checkbox"/> Ventilator<br><input type="checkbox"/> Both                                                                                                      |
| <b>30</b>                                      | Any neonatal infection during hospitalisation | <input type="checkbox"/> Yes<br><input type="checkbox"/> No                                                                                                                                                |
| <b>31</b>                                      | If yes, is the antibiotics started on time    | <input type="checkbox"/> Yes<br><input type="checkbox"/> No                                                                                                                                                |
| <b>OUTCOME AND CAUSE OF NEONATAL MORTALITY</b> |                                               |                                                                                                                                                                                                            |
| <b>32</b>                                      | Mode of Discharge                             | <input type="checkbox"/> Cured<br><input type="checkbox"/> Death<br><input type="checkbox"/> Escaped<br><input type="checkbox"/> Against the medical advice<br><input type="checkbox"/> Still hospitalised |
| <b>33</b>                                      | Causes of neonatal mortality                  | <input type="checkbox"/> .....                                                                                                                                                                             |
| <b>34</b>                                      | Length of stay in hospital                    | <input type="checkbox"/> > 5 days<br><input type="checkbox"/> ≤ 5 days                                                                                                                                     |
| <b>35</b>                                      | Date of end of follow up                      | <input type="checkbox"/> ...../.....20....                                                                                                                                                                 |
| <b>36</b>                                      | Status at 28 <sup>th</sup> day after birth    | <input type="checkbox"/> Live<br><input type="checkbox"/> Dead                                                                                                                                             |

Data collector:.....
